# Supplementary material for: Effects of anti-obesity drugs on cardiometabolic risk factors in pediatric population with obesity: a systematic review and meta-analysis of randomized controlled trials
Source: publisher site journal article supplement (doi:10.1515/ijamh-2024-0196), 2025-06-01
Supplement: Supplementary file 1 [file j_ijamh-2024-0196_suppl_001.docx]

**Table S1** (Supplementary file): Search strategy and results yield

| ***Database*** | | **Query** | **Results** |
| --- | --- | --- | --- |
| **PubMed**  **[All Fields]** | ***Search 1*** | "obeses"[All Fields] OR "obesity"[MeSH Terms] OR "obesity"[All Fields] OR "obese"[All Fields] OR "obesities"[All Fields] OR "obesity s"[All Fields] OR ("overweight"[MeSH Terms] OR "overweight"[All Fields] OR "overweighted"[All Fields] OR "overweightness"[All Fields] OR "overweights"[All Fields]) OR ("weight s"[All Fields] OR "weighted"[All Fields] OR "weighting"[All Fields] OR "weightings"[All Fields] OR "weights and measures"[MeSH Terms] OR ("weights"[All Fields] AND "measures"[All Fields]) OR "weights and measures"[All Fields] OR "weight"[All Fields] OR "body weight"[MeSH Terms] OR ("body"[All Fields] AND "weight"[All Fields]) OR "body weight"[All Fields] OR "weights"[All Fields]) OR "adipos*"[All Fields] OR "obes*"[All Fields] | 2310760 |
| ***Search 2*** | "Anti-Obesity Agents"[All Fields] OR "Anti-Obesity Drugs"[All Fields] OR "Appetite Depressants"[All Fields] OR "Appetite suppressants"[All Fields] OR "Anorexic agents"[All Fields] OR "Anorectic agents"[All Fields] OR "glp 1"[All Fields] OR "ehmt1 protein human"[Supplementary Concept] OR "ehmt1 protein human"[All Fields] OR "glp1"[All Fields] OR "glp 1"[All Fields] OR "glucagon-like peptide"[All Fields] OR "glucagon analogs"[All Fields] OR "phentermine"[Supplementary Concept] OR "phentermine"[All Fields] OR "phentermine"[MeSH Terms] OR "orlistat"[Supplementary Concept] OR "orlistat"[All Fields] OR "orlistat"[MeSH Terms] OR "orlistat s"[All Fields] OR "semaglutide"[Supplementary Concept] OR "semaglutide"[All Fields] OR "liraglutid"[All Fields] OR "liraglutide"[Supplementary Concept] OR "liraglutide"[All Fields] OR "liraglutide"[MeSH Terms] OR "liraglutide s"[All Fields] | 43362 |
| ***Search 3*** | "child*"[All Fields] OR ("paediatrics"[All Fields] OR "pediatrics"[MeSH Terms] OR "pediatrics"[All Fields] OR "paediatric"[All Fields] OR "pediatric"[All Fields]) OR ("minority groups"[MeSH Terms] OR ("minority"[All Fields] AND "groups"[All Fields]) OR "minority groups"[All Fields] OR "minorities"[All Fields] OR "minority"[All Fields] OR "minority s"[All Fields] OR "minors"[MeSH Terms] OR "minors"[All Fields] OR "minor"[All Fields]) OR ("men"[MeSH Terms] OR "men"[All Fields] OR "boy"[All Fields]) OR ("men"[MeSH Terms] OR "men"[All Fields] OR "boys"[All Fields]) OR "boyhood"[All Fields] OR ("women"[MeSH Terms] OR "women"[All Fields] OR "girl"[All Fields]) OR "kid"[All Fields] OR "kids"[All Fields] OR ("child"[MeSH Terms] OR "child"[All Fields] OR "children"[All Fields] OR "child s"[All Fields] OR "children s"[All Fields] OR "childrens"[All Fields] OR "childs"[All Fields]) OR "schoolchild"[All Fields] OR "adolescen*"[All Fields] OR "juvenil*"[All Fields] OR ("adolescent"[MeSH Terms] OR "adolescent"[All Fields] OR "teen"[All Fields]) OR ("preteen"[All Fields] OR "preteens"[All Fields]) OR ("adolescent"[MeSH Terms] OR "adolescent"[All Fields] OR "youth"[All Fields] OR "youths"[All Fields] OR "youth s"[All Fields]) OR "underage*"[All Fields] OR "under age"[All Fields] OR "pubescen*"[All Fields] OR "pediatric*"[All Fields] | 6919597 |
| ***Search 4*** | (("cardiometabolic risk"[All Fields] OR "blood pressure"[All Fields] OR ("systole"[MeSH Terms] OR "systole"[All Fields] OR "systoles"[All Fields] OR "systolic"[All Fields] OR "systolically"[All Fields]) OR ("diastole"[MeSH Terms] OR "diastole"[All Fields] OR "diastoles"[All Fields] OR "diastolic"[All Fields] OR "diastolically"[All Fields]) OR "SBP"[All Fields] OR "DBP"[All Fields] OR ("lipid s"[All Fields] OR "lipidate"[All Fields] OR "lipidated"[All Fields] OR "lipidates"[All Fields] OR "lipidation"[All Fields] OR "lipidations"[All Fields] OR "lipide"[All Fields] OR "lipides"[All Fields] OR "lipidic"[All Fields] OR "lipids"[Supplementary Concept] OR "lipids"[All Fields] OR "lipid"[All Fields] OR "lipids"[MeSH Terms]) OR "HDL"[All Fields] OR "high density lipoprotein"[All Fields] OR ("oxidized low density lipoprotein"[Supplementary Concept] OR "oxidized low density lipoprotein"[All Fields] OR "ldl"[All Fields]) OR "low density lipoprotein"[All Fields]) AND "VLDL"[All Fields]) OR "very low density lipoprotein"[All Fields] OR ("trans gis"[Journal] OR "ieee trans games"[Journal] OR "tg"[All Fields]) OR "triglyceride*"[All Fields] OR ("cholesterol"[Supplementary Concept] OR "cholesterol"[All Fields] OR "cholesterol"[MeSH Terms] OR "cholesterol s"[All Fields] OR "cholesterole"[All Fields] OR "cholesterols"[All Fields]) OR ("dyslipidaemias"[All Fields] OR "dyslipidemias"[MeSH Terms] OR "dyslipidemias"[All Fields] OR "dyslipidaemia"[All Fields] OR "dyslipidemia"[All Fields]) OR ("hyperinsulinaemia"[All Fields] OR "hyperinsulinism"[MeSH Terms] OR "hyperinsulinism"[All Fields] OR "hyperinsulinemia"[All Fields]) OR ("insulin"[Supplementary Concept] OR "insulin"[All Fields] OR "insulin"[MeSH Terms] OR "insulin s"[All Fields] OR "insuline"[All Fields] OR "insulinic"[All Fields] OR "insulinization"[All Fields] OR "insulinized"[All Fields] OR "insulins"[MeSH Terms] OR "insulins"[All Fields]) OR ("glucose"[Supplementary Concept] OR "glucose"[All Fields] OR "glucose"[MeSH Terms] OR "glucoses"[All Fields] OR "glucose s"[All Fields]) OR "Insulin resistance"[All Fields] OR "waist circumference"[All Fields] OR "C-reactive protein"[All Fields] OR ("curr res psychol"[Journal] OR "crp"[All Fields]) | 1569856 |
| ***Search 5*** | "RCT"[All Fields] OR "Randomized controlled trials"[All Fields] OR "Clinical trial"[All Fields] OR "Controlled clinical trial"[All Fields] | 1102147 |
| ***Search 6*** | # 1 AND # 2 AND # 3 AND # 4 AND # 5  Filters: Clinical Trial, Randomized Controlled Trial | 217 |
| **Web of Science** | ***Search 1*** | ALL=(Obesity OR Overweight OR Weight OR Adiposity OR Obese) | 3137690 |
| ***Search 2*** | ALL=((Anti-Obesity Agents) OR (Anti-Obesity Drugs) OR (Appetite Depressants) OR (Appetite suppressants) OR (Anorexic agents) OR (Anorectic agents) OR (GLP 1) OR GLP1 OR (GLP-1) OR (glucagon-like peptide) OR (glucagon analogs) OR Phentermine OR Orlistat OR Semaglutide OR Liraglutide) | 55121 |
| ***Search 3*** | ALL=(Child OR Children OR Pediatrics OR Minors OR boy or boys or boyhood OR girl OR kid or kids OR child or schoolchild OR adolescent OR juvenile OR teen OR preteen OR youth OR underage OR (under age) OR pubescent OR pediatric) | 5620347 |
| ***Search 4*** | ALL=((cardiometabolic risk) OR (blood pressure) OR systolic OR diastolic OR SBP OR DBP OR lipid OR HDL OR (high density lipoprotein) OR LDL OR (low density lipoprotein) VLDL OR (very low density lipoprotein) OR TG OR triglyceride OR cholesterol OR dyslipidemia OR hyperinsulinemia OR insulin OR glucose OR (Insulin resistance) OR (waist circumference) OR (C-reactive protein) OR CRP) | 3435160 |
| ***Search 5*** | ALL=(RCT OR (Randomized controlled trials) OR (Clinical trial) OR (Controlled clinical trial)) | 1554738 |
| ***Search 6*** | # 1 AND # 2 AND # 3 AND # 4 AND # 5 and English (Languages) and Open Access and Review Article (Exclude – Document Types) and Enriched Cited References (Exclude) | 100 |
| **Scopus** | ***Search 1*** | TITLE-ABS-KEY (Obesity OR Overweight OR Weight OR Adiposity OR Obese) | 4300221 |
| ***Search 2*** | TITLE-ABS-KEY (“Anti-Obesity Agents” OR “Anti-Obesity Drugs” OR “Appetite Depressants” OR “Appetite suppressants” OR “Anorexic agents” OR “Anorectic agents” OR “GLP 1” OR GLP1 OR “GLP-1” OR “glucagon-like peptide” OR “glucagon analogs” OR Phentermine OR Orlistat OR Semaglutide OR Liraglutide) | 166098 |
| ***Search 3*** | TITLE-ABS-KEY (Child OR Children OR Pediatrics OR Minors OR boy or boys or boyhood OR girl OR kid or kids OR child or schoolchild OR adolescent OR juvenile OR teen OR preteen OR youth OR underage OR (under age) OR pubescent OR pediatric) | 7555431 |
| ***Search 4*** | TITLE-ABS-KEY (“cardiometabolic risk” OR “blood pressure” OR systolic OR diastolic OR SBP OR DBP OR lipid OR HDL OR “high density lipoprotein” OR LDL OR “low density lipoprotein” VLDL OR “very low density lipoprotein” OR TG OR triglyceride* OR cholesterol OR dyslipidemia OR hyperinsulinemia OR insulin OR glucose OR “Insulin resistance” OR "waist circumference" OR “C-reactive protein” OR CRP) | 5543871 |
| ***Search 5*** | TITLE-ABS-KEY RCT OR "Randomized controlled trials” OR "Clinical trial" OR "Controlled clinical trial" | 2398743 |
| ***Search 6*** | # 1 AND # 2 AND # 3 AND # 4 AND # 5 | 295 |


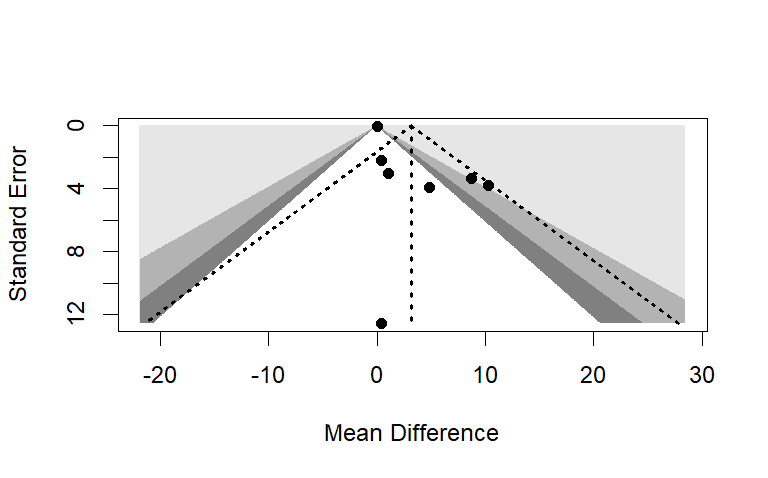

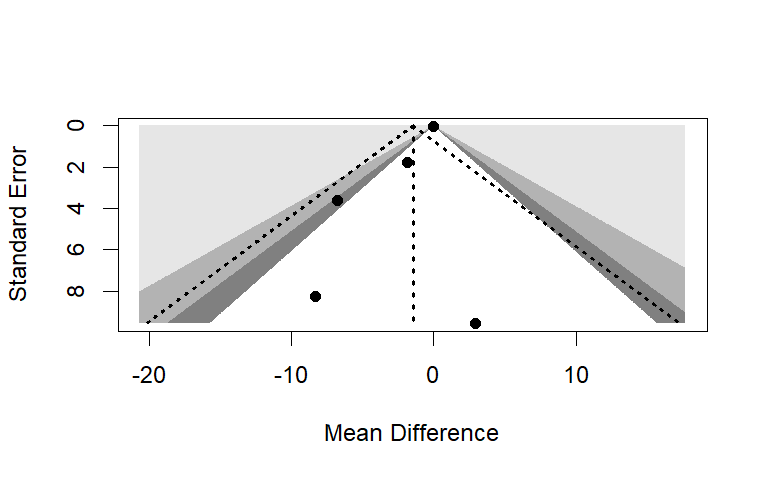


**A: High Density Lipoproteins B: Low Density Lipoproteins**
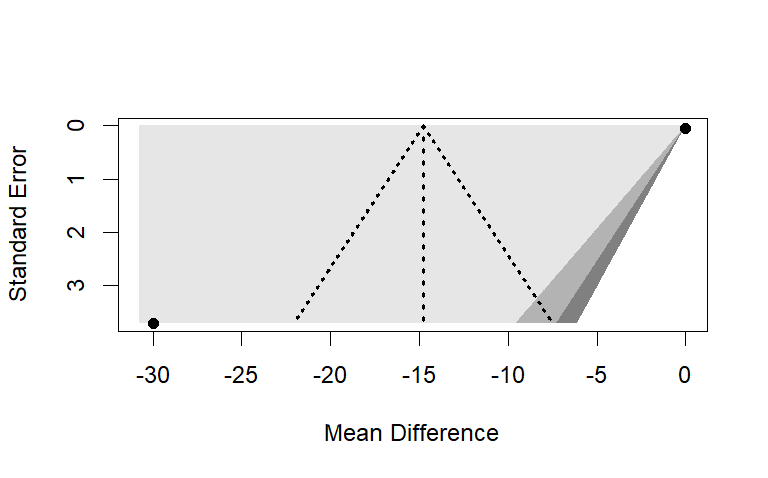

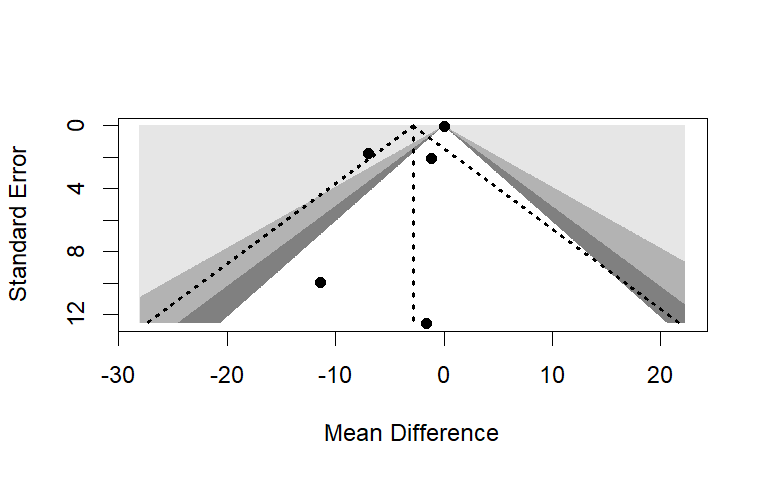


**C: Very Low Density Lipoproteins D: Total Cholesterol**


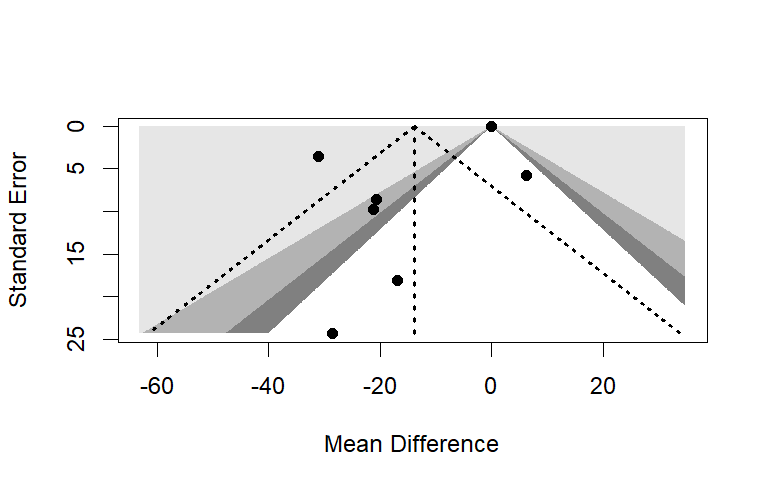

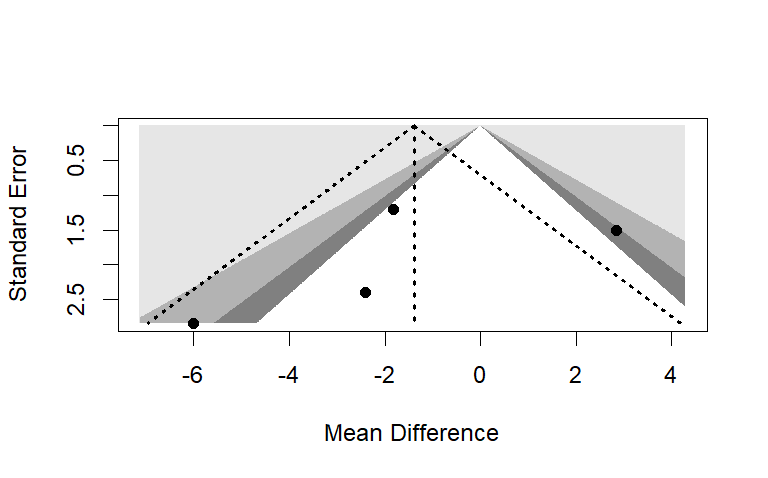


**E: Triglycerides F: Fasting Glucose**


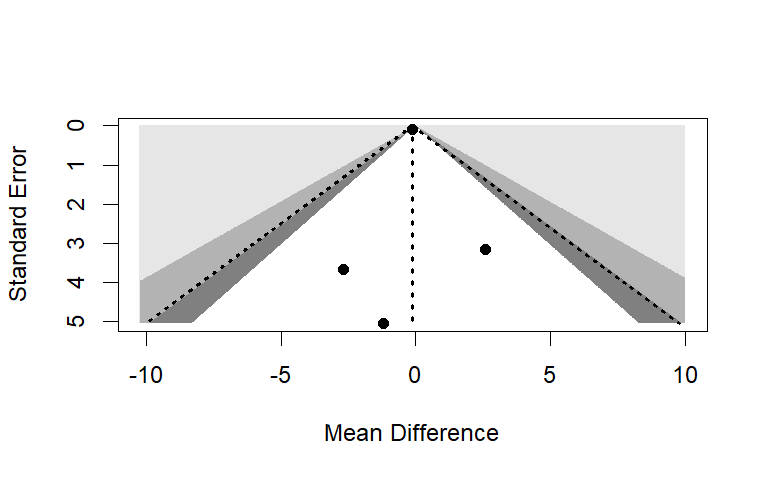

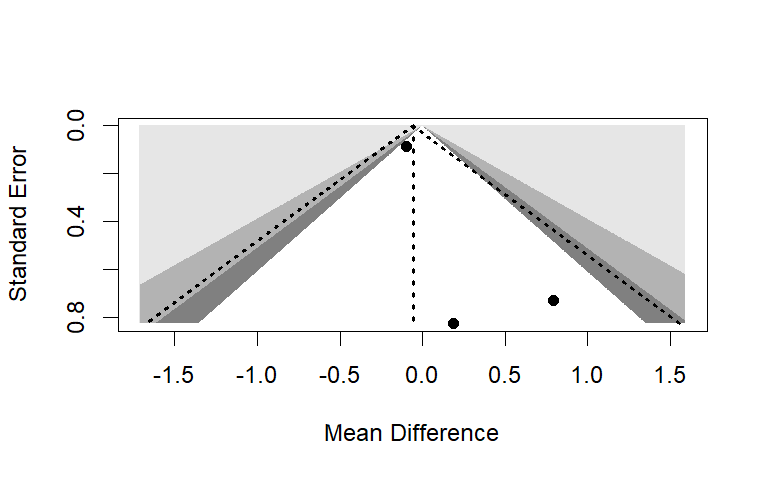


**G: Fasting Insulin H: Insulin Resistance**


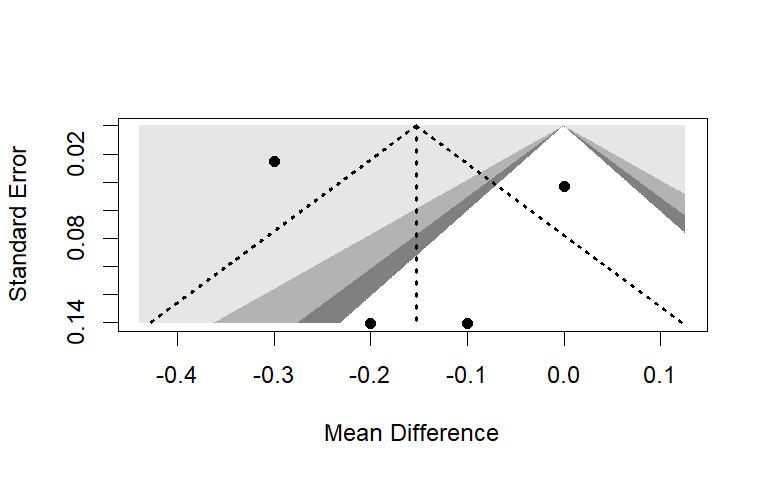

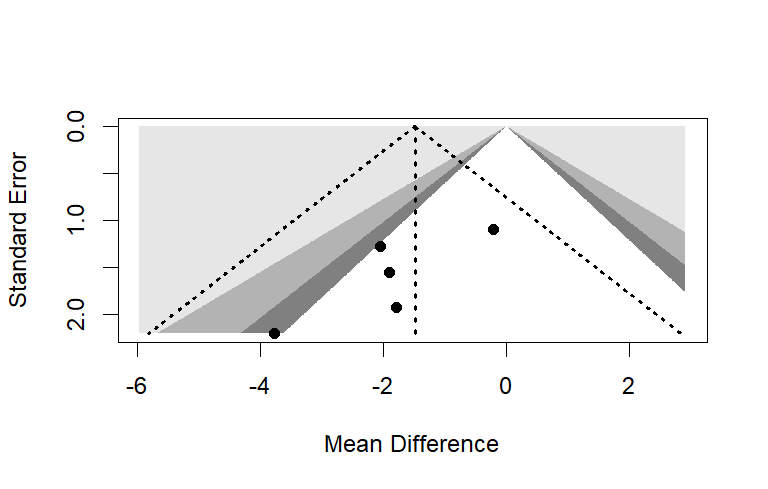


**I: Hb A1C % J: Systolic Blood Pressure**


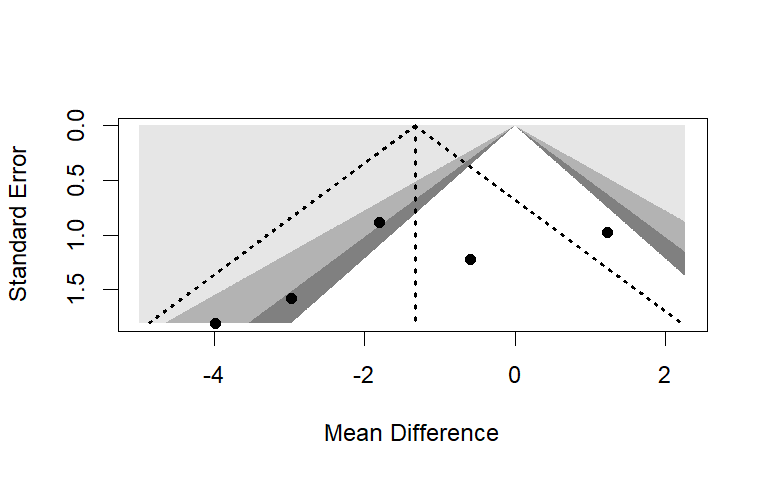

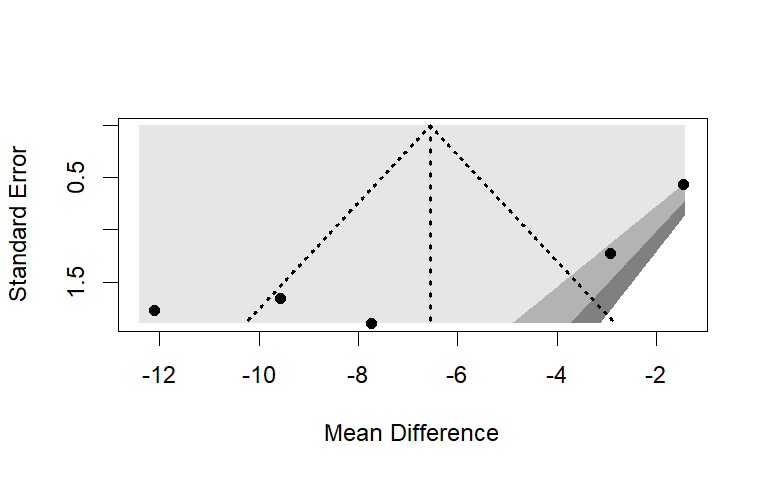


**K: Diastolic Blood Pressure L: Waist Circumference**


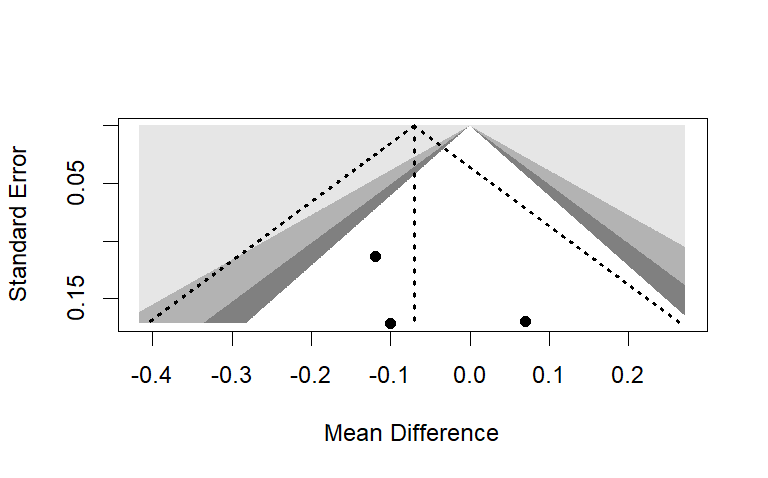


**M: C-Reactive Protein**

**Figure S1: Funnel Plots of studies included in the pooled estimates of effects of anti-obesity drugs on A) High Density Lipoproteins B) Low Density Lipoproteins C) Very Low Density Lipoproteins D) Total Cholesterol E) Triglycerides F) Fasting Glucose G) Fasting Insulin H) Insulin Resistance I) Hb A1C % J) Systolic Blood Pressure K) Diastolic Blood Pressure L) Waist Circumference M) C-Reactive Protein**
